# Supplementary material for: Bacterial Community Structure in Rhizosphere of Barley at Maturity Stage
Source: MDPI journal article supplement (doi:10.3390/agronomy13112825), 2023-11-16
Supplement: s1 [file s1]

# Bacterial community structure in rhizosphere of barley at maturity stage

Siyu Zhang , Yue An, Yu Zhou, Xiaofang Wang, Yiqing Tang, Daorong Zhang, Genlou Sun, Qifei Wang and Xifeng Ren

Table S1. Valid sequences and lengths of the 35 samples.

| Sample  | Seq_num | Base_num  | Mean_length | Min_length | Max_length |
|---------|---------|-----------|-------------|------------|------------|
| R1      | 41784   | 17421949  | 416.952637  | 232        | 482        |
| R2      | 30681   | 12789607  | 416.857567  | 270        | 444        |
| R3      | 39728   | 16546903  | 416.504808  | 232        | 461        |
| R4      | 43369   | 18088579  | 417.085453  | 245        | 481        |
| R5      | 36850   | 15372874  | 417.174328  | 274        | 499        |
| R6      | 49107   | 20477649  | 417.000611  | 230        | 481        |
| R7      | 44724   | 18629932  | 416.553349  | 230        | 496        |
| R8      | 41465   | 17279872  | 416.73392   | 209        | 458        |
| R9      | 40975   | 17120846  | 417.836388  | 203        | 530        |
| R10     | 36965   | 15423983  | 417.25911   | 246        | 469        |
| R11     | 40584   | 16916601  | 416.829317  | 202        | 470        |
| R12     | 40637   | 16947760  | 417.05244   | 229        | 503        |
| R13     | 46503   | 19396995  | 417.112767  | 230        | 482        |
| R14     | 37669   | 15774141  | 418.756564  | 232        | 478        |
| R15     | 39737   | 16569062  | 416.968115  | 202        | 490        |
| R16     | 39025   | 16248234  | 416.354491  | 220        | 458        |
| R17     | 38815   | 16155273  | 416.212109  | 300        | 472        |
| R18     | 43757   | 18223366  | 416.467445  | 210        | 500        |
| R19     | 40776   | 16959354  | 415.915097  | 223        | 493        |
| R20     | 39809   | 16629425  | 417.730287  | 279        | 507        |
| R21     | 38001   | 15874184  | 417.730691  | 230        | 458        |
| R22     | 41993   | 17504545  | 416.844355  | 230        | 482        |
| R23     | 43342   | 18080208  | 417.152139  | 248        | 458        |
| R24     | 40114   | 16697082  | 416.240764  | 223        | 484        |
| R25     | 38029   | 15882362  | 417.638171  | 214        | 463        |
| R26     | 38103   | 15900153  | 417.293993  | 203        | 474        |
| R27     | 41431   | 17261786  | 416.639376  | 203        | 507        |
| R28     | 36109   | 15053155  | 416.880972  | 211        | 452        |
| R29     | 41564   | 17307242  | 416.399817  | 222        | 503        |
| R30     | 42264   | 17646523  | 417.53083   | 202        | 478        |
| R31     | 36107   | 15054465  | 416.940344  | 203        | 504        |
| R32     | 37041   | 15451763  | 417.152966  | 250        | 471        |
| R33     | 41589   | 17307788  | 416.162639  | 245        | 497        |
| R34     | 36589   | 15275629  | 417.492388  | 260        | 461        |
| R35     | 45768   | 19056186  | 416.36484   | 230        | 450        |
| Total   | 1411004 | 588325476 | --          | --         | --         |
| Average | 40314.4 | 16809277  | 419.966     | 202        | 530        |

Table S2 Overview of percentage data of dominant bacteria at order level.

| Class name          | Range  | Minimum | Maximum | Median | Average | Standard deviation | Coefficient of variation |
|---------------------|--------|---------|---------|--------|---------|--------------------|--------------------------|
| Vicinamibacterales  | 0.1510 | 0.0146  | 0.1656  | 0.0671 | 0.0680  | 0.0300             | 0.4414                   |
| Rhizobiales         | 0.0707 | 0.0461  | 0.1168  | 0.0646 | 0.0682  | 0.0156             | 0.2289                   |
| Burkholderiales     | 0.0664 | 0.0479  | 0.1143  | 0.0607 | 0.0644  | 0.0135             | 0.2091                   |
| Chloroflexales      | 0.0557 | 0.0215  | 0.0772  | 0.0566 | 0.0539  | 0.0127             | 0.2352                   |
| Gaiellales          | 0.0662 | 0.0234  | 0.0896  | 0.0510 | 0.0524  | 0.0146             | 0.2792                   |
| Gemmatimonadales    | 0.0498 | 0.0297  | 0.0795  | 0.0660 | 0.0504  | 0.0099             | 0.1967                   |
| Micrococcales       | 0.0737 | 0.0161  | 0.0898  | 0.0462 | 0.0473  | 0.0180             | 0.3805                   |
| Solirubrobacterales | 0.0343 | 0.0207  | 0.0550  | 0.0321 | 0.0345  | 0.0091             | 0.2632                   |
| Sphingomonadales    | 0.0354 | 0.0128  | 0.0482  | 0.0328 | 0.0333  | 0.0079             | 0.2368                   |
| Bacillales          | 0.0831 | 0.0163  | 0.0994  | 0.0295 | 0.0327  | 0.0167             | 0.5098                   |

Table S3 Overview of percentage data of dominant bacteria at family level.

| Class name                    | Range  | Minimum | Maximum | Median | Average | Standard deviation | Coefficient of variation |
|-------------------------------|--------|---------|---------|--------|---------|--------------------|--------------------------|
| Roseiflexaceae                | 0.0534 | 0.0207  | 0.0741  | 0.0539 | 0.0519  | 0.0122             | 0.2344                   |
| Gemmatimonadaceae             | 0.0498 | 0.0297  | 0.0795  | 0.0497 | 0.0504  | 0.0099             | 0.1967                   |
| f_norank_o_Vicinamibacterales | 0.0831 | 0.0084  | 0.0915  | 0.0357 | 0.0367  | 0.0161             | 0.4398                   |
| Xanthobacteraceae             | 0.0293 | 0.0247  | 0.0540  | 0.0349 | 0.0364  | 0.0077             | 0.2119                   |
| f_norank_o_Gaiellales         | 0.0457 | 0.0147  | 0.0604  | 0.0342 | 0.0350  | 0.0100             | 0.2844                   |
| Sphingomonadaceae             | 0.0354 | 0.0128  | 0.0482  | 0.0328 | 0.0333  | 0.0079             | 0.2368                   |
| Bacillaceae                   | 0.0833 | 0.0158  | 0.0991  | 0.0290 | 0.0323  | 0.0167             | 0.5171                   |
| Vicinamibacteraceae           | 0.0680 | 0.0061  | 0.0741  | 0.0285 | 0.0313  | 0.0146             | 0.4655                   |
| Chitinophagaceae              | 0.0478 | 0.0095  | 0.0573  | 0.0236 | 0.0244  | 0.0085             | 0.3486                   |
| Pyrinomonadaceae              | 0.0393 | 0.0059  | 0.0452  | 0.0234 | 0.0240  | 0.0101             | 0.4192                   |

Table S4 Six alpha diversity indexes of the three clusters.

| group | sobs     | shannon | simpson | ace      | chao     | coverage |
|-------|----------|---------|---------|----------|----------|----------|
| II    | 2227.714 | 6.453   | 0.00391 | 2978.783 | 3013.879 | 0.974    |
| III   | 2308.643 | 6.504   | 0.00378 | 3091.230 | 3096.675 | 0.973    |
| IV    | 2297.5   | 6.494   | 0.00418 | 3030.112 | 3033.650 | 0.973    |

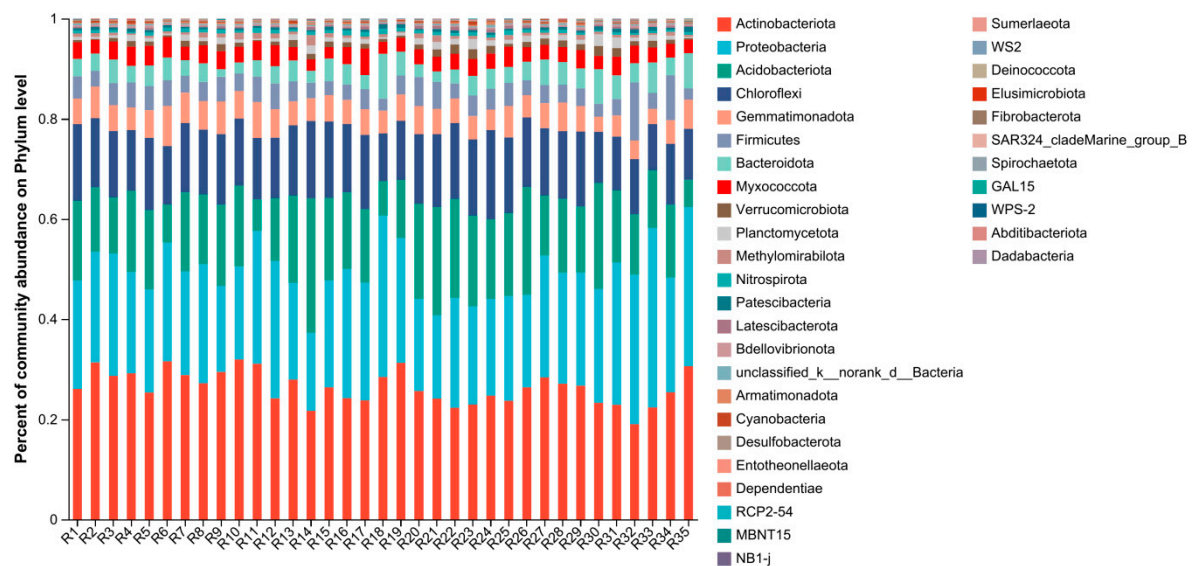

Figure S1 Community abundance at phylum level.

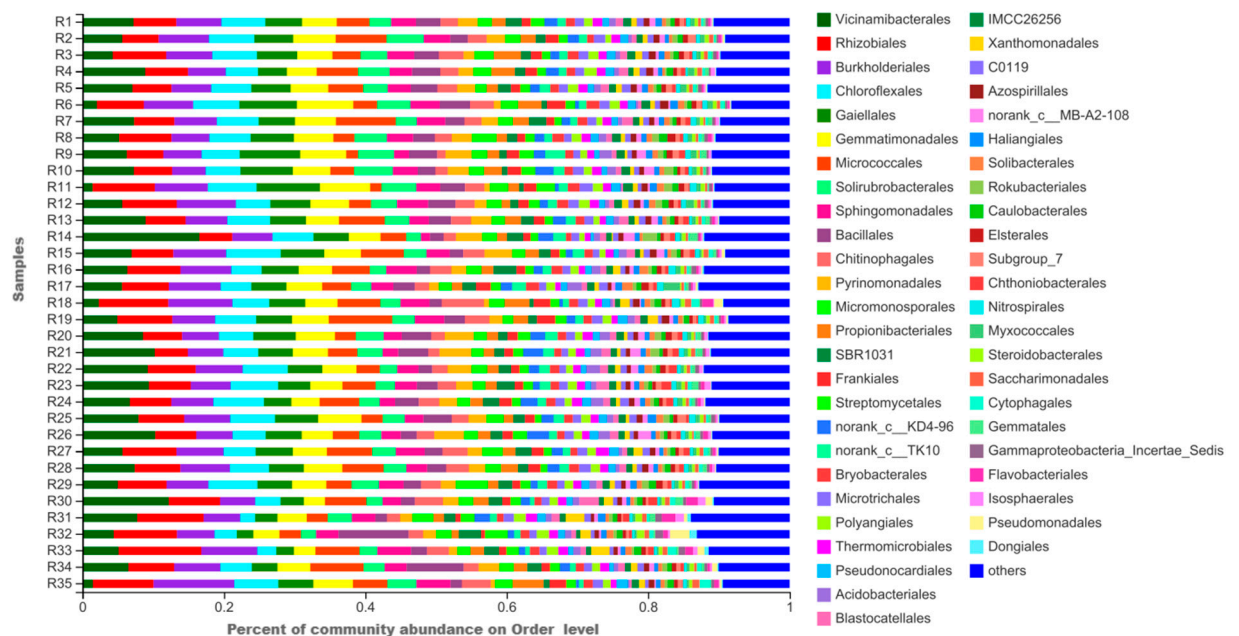

Figure S2 Abundance at the Order level of barley rhizosphere bacteria

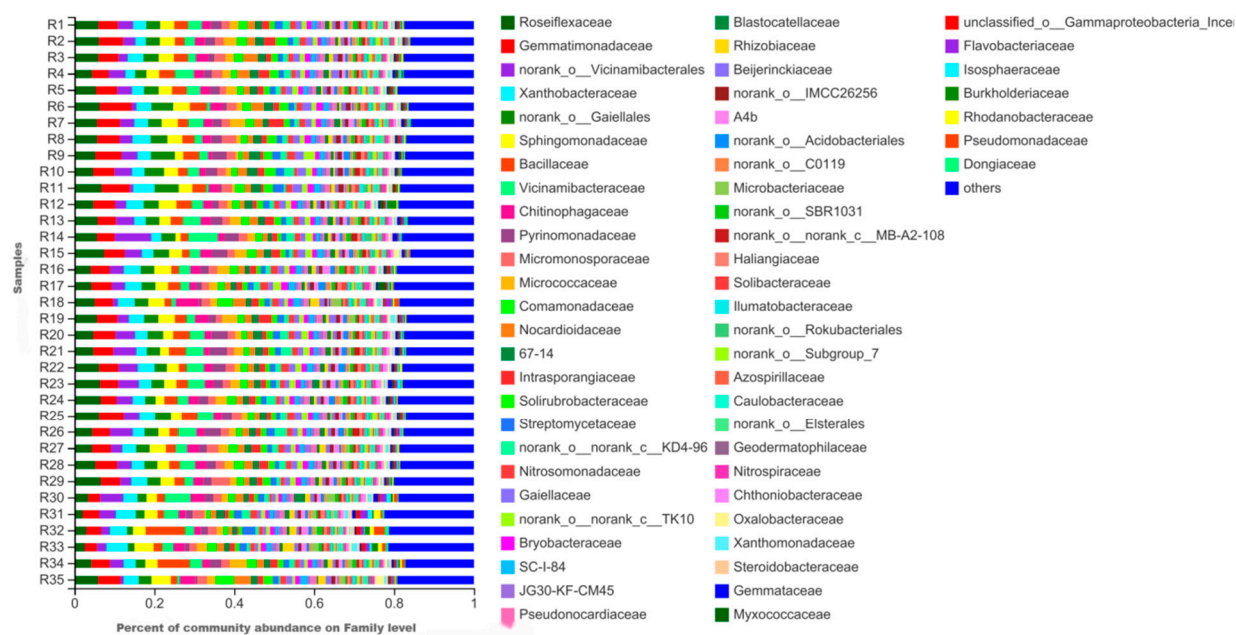

Figure S3 Abundance at the family level of barley rhizosphere bacteria
